# Supplementary material for: Cardanol Groups Grafted on Poly(vinyl chloride)—Synthesis, Performance and Plasticization Mechanism
Source: PubMed Central journal article supplement (PMC6418606; doi:10.3390/polym9110621), 2017-11-15
Supplement: polymers-09-00621-s001.pdf [file polymers-09-00621-s001.pdf]

1 Article

2 **Cardanol Groups Grafted on Poly(Vinyl Chloride) -**  
 3 **Synthesis, Performance and Plasticization**  
 4 **Mechanism**

5 Puyou Jia<sup>1</sup>, Meng Zhang<sup>1,2\*</sup>, Lihong Hu<sup>1,2</sup>, Rui Wang<sup>3</sup>, Chao Sun<sup>3</sup>, Yonghong Zhou<sup>1\*</sup>

6 <sup>1</sup> Institute of Chemical Industry of Forest Products, Chinese Academy of Forestry (CAF); National  
 7 Engineering Lab for Biomass Chemical Utilization; Key Lab on Forest Chemical Engineering, State Forestry  
 8 Administration; and Key Lab of Biomass Energy and Materials, Jiangsu Province, 16 Suojin North Road,  
 9 Nanjing 210042, P.R. China; yhzhou777@sina.com

10 <sup>2</sup> Institute of New Technology of Forestry, Chinese Academy of Forest (CAF), Beijing 100091, P. R.  
 11 China; zhangmeng82@163.com

12 <sup>3</sup> Nanjing Forestry University, College of Materials Science and Engineering, 159 Longpan Road, Nanjing  
 13 210037, P.R. China; 641214952@qq.com

14 \* Correspondence: yhzhou777@sina.com; zhangmeng82@163.com; Tel.: +86-025-85482520

15

16

17

**Supporting informations**

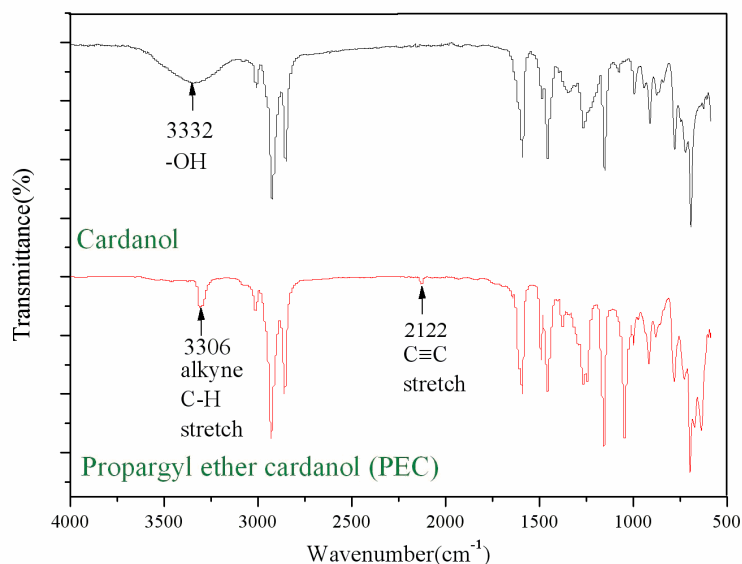

18

19

**Figure.S1** FT-IR spectra of cardanol and PEC

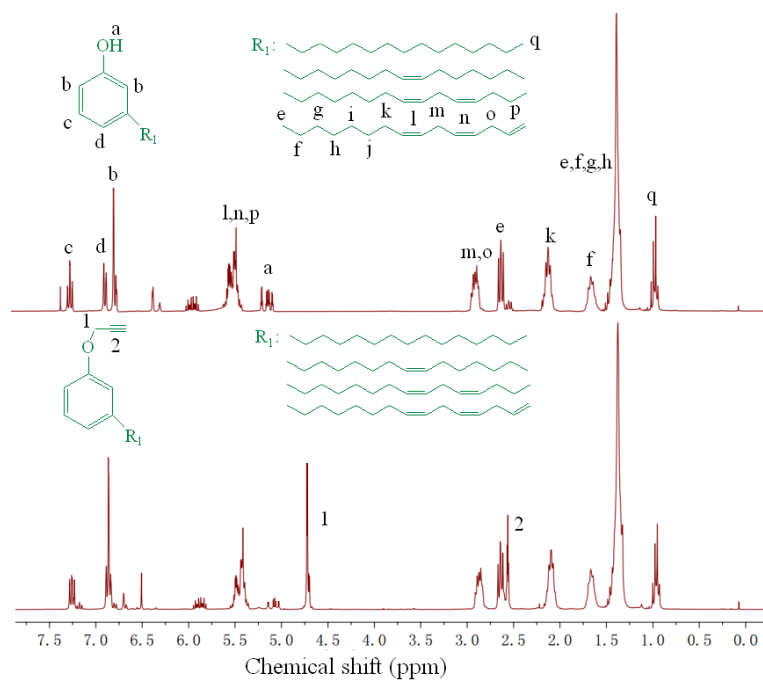

20

21

Figure.S2 <sup>1</sup>H NMR of cardanol and PEC

22

23

Table S1 shows the composition of reactants.

| Internally plasticized PVC materials | PVC-N <sub>3</sub> | PEC                 | Cuprous bromide                  | 2, 2'-dipyridine |
|--------------------------------------|--------------------|---------------------|----------------------------------|------------------|
| PVC-0.25PEC                          | 1g(0.05m mol)      | 0.25g (0.73mmol)    | 0.21g (1.46mmol)                 | 0.46g (2.92mmol) |
| PVC-0.50PEC                          | 1g(0.05m mol)      | 0.50g (1.45mmol)    | 0.42(2.93mmol) cuprous bromide   | 0.92g(5.90mmol)  |
| PVC-0.75PEC                          | 1g(0.05m mol)      | 0.75g (2.19mmol)PEC | 0.63g (4.38mmol) cuprous bromide | 1.38g(8.85mmol)  |

24

25

26

27
